# Supplementary material for: Integrated Proteomics and Metabolomics of Arabidopsis Acclimation to Gene-Dosage Dependent Perturbation of Isopropylmalate Dehydrogenases
Source: PLoS One. 2013 Mar 22;8(3):e57118. doi: 10.1371/journal.pone.0057118 (PMC3606340; doi:10.1371/journal.pone.0057118)
Supplement: Table S1 — List of primer sequences used for the RT-PCR experiments. (XLS) [file pone.0057118.s001.xls]

## Sheet: Sheet1
Table S1. List of primer sequences used for the RT-PCR experiments.
Primers	Primer Sequence (5'-3')
IPMDH1-L1	GAACATCAGTCTGAATGCGATCAA
IPMDH1-R1	GGTACAATGTTGCATGGATTAGCA
IPMDH1-L2	TGGCTCTGTTTTACCTTAGA
IPMDH2-L1	CTACGTTCAGAGCTGTAAG
IPMDH2-R1	GCACGAATCTGAAGTAACC
IPMDH2-R2	AGTCCCTCTAATAATCTCAC
IPMDH3-L1	CTGGAGATCATACCGGGAA
IPMDH3-R1	TCGAATGTTAAGCAGACCCA
IPMDH2-R2	AACCAAGGGCTACACACTT
